# Supplementary material
Source: PubMed Central journal article supplement (PMC4294227)
Supplement: IAI.02664-14_zii999091085so1.pdf [file IAI.02664-14_zii999091085so1.pdf]

## Supplementary Material

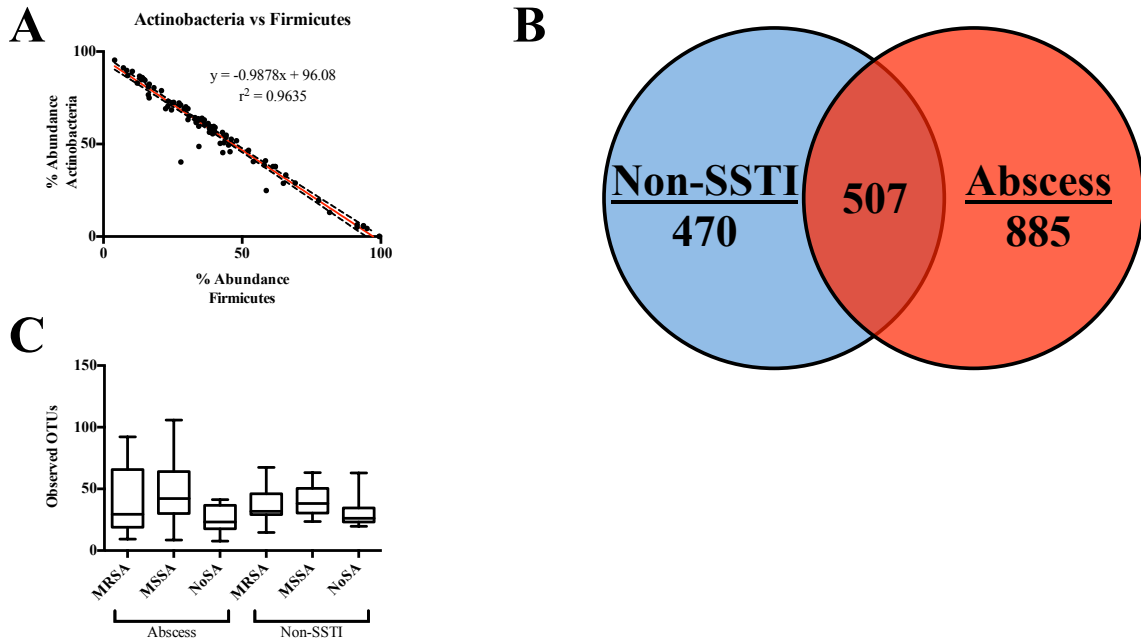

**Supplementary Figure 1.** Characterization of the nasal microbiomes. **A**, Inverse correlation between Actinobacteria and Firmicutes for all nasal samples (slope (m) = -0.9878). Red line and inset equation represent the best fit line ( $y = \text{slope}(x) + y\text{-intercept}$ ). Dashed lines show the 95% confidence interval.  $r^2 =$  Coefficient of determination. **B**, Venn-diagram representing the number of Operational Taxonomic Units (OTUs) that were unique as well as shared between the Non-SSTI and abscess nasal groups. **C**, The number of OTUs for individuals colonized (MRSA and MSSA) or not colonized (NoSA) with *S. aureus* that either did (Abscess) or did not develop SSTI (Non-SSTI). Each box represents the interquartile range with the mean shown within. The whiskers spread from the minimum to maximum values.

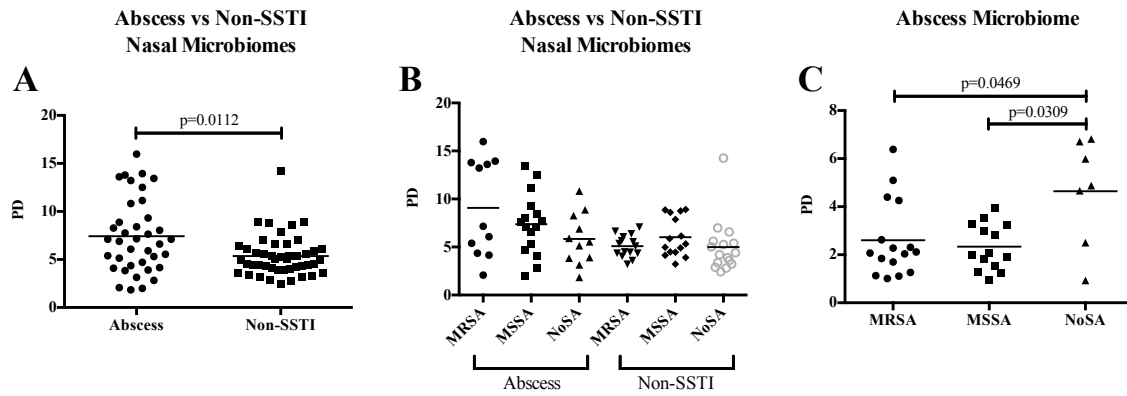

**Supplementary Figure 2.** Phylogenetic diversity (PD) as determined using Faith's index between the **A**, abscess and Non-SSTI nasal microbiomes and **B**, various nasal microbiome subgroupings as determined by *S. aureus* colonization status (MRSA, MSSA, NoSA). **C**, PD was also computed for the abscess cavity microbiomes. The various subgrouping are based on infecting *S. aureus* strain (MRSA, MSSA, NoSA).

**Supplementary Table 1: Study Participant Characteristics\***

|                                                                         | <b>Abscess (n=38)</b> | <b>Non-SSTI (n=46)</b> |
|-------------------------------------------------------------------------|-----------------------|------------------------|
| <b>Age</b>                                                              |                       |                        |
| Median years (range)                                                    | 20 (17-33)            | 20.5 (18-39)           |
| <b>Race / Ethnicity<sup>a</sup></b>                                     |                       |                        |
| White, non-Hispanic                                                     | 28 (74)               | - <sup>b</sup>         |
| Hispanic                                                                | 5 (13.2)              | -                      |
| Black, non-Hispanic                                                     | 3 (7.9)               | -                      |
| Other, non-Hispanic                                                     | 1 (2.6)               | -                      |
| <b>Nasal Colonization</b>                                               |                       |                        |
| MRSA                                                                    | 11 (28.9)             | 15 (32.6)              |
| MSSA                                                                    | 16 (42.1)             | 15 (32.6)              |
| NoSA                                                                    | 11 (28.9)             | 16 (34.8)              |
| <b>Abscess Colonization</b>                                             |                       |                        |
| MRSA                                                                    | 16 (42.1)             | NA                     |
| MSSA                                                                    | 15 (39.5)             | NA                     |
| NoSA                                                                    | 7 (18.4)              | NA                     |
| <b>Site of Infection<sup>c</sup></b>                                    |                       |                        |
| Lower extremity                                                         | 19 (50)               | NA                     |
| Ankle                                                                   | 1 (2.6)               |                        |
| Buttock                                                                 | 5 (13.2)              |                        |
| Foot                                                                    | 1 (2.6)               |                        |
| Knee                                                                    | 7 (18.4)              |                        |
| Thigh                                                                   | 5 (13.2)              |                        |
| Upper extremity                                                         | 11 (28.9)             | NA                     |
| Arm                                                                     | 2 (5.3)               |                        |
| Elbow                                                                   | 5 (13.2)              |                        |
| Finger                                                                  | 1 (2.6)               |                        |
| Forearm                                                                 | 3 (7.9)               |                        |
| Thorax                                                                  | 4 (10.5)              | NA                     |
| Axilla                                                                  | 3 (7.9)               |                        |
| Back                                                                    | 1 (2.6)               |                        |
| Head and neck                                                           | 3 (7.9)               | NA                     |
| Neck                                                                    | 2 (5.3)               |                        |
| Scalp                                                                   | 1 (2.6)               |                        |
| <b>Hygiene Study Group<sup>d</sup></b>                                  |                       |                        |
| Standard                                                                | 8 (21)                | 20 (43.5)              |
| Enhanced Standard                                                       | 11 (28.9)             | 20 (43.5)              |
| Chlorhexidine                                                           | 19 (50)               | 6 (13)                 |
| <b>Known/Suspected SSTI/MRSA Infection in the Past Year<sup>e</sup></b> | 2 (5.3)               |                        |

\*Unless specified, numbers in parenthesis correspond to percentage of total individuals in either Abscess or Non-SSTI groups.

Abbreviations: Abscess, individuals that developed SSTI; Non-SSTI, individuals that did not develop SSTI; MRSA, Methicillin-Resistant *Staphylococcus aureus*; MSSA, Methicillin-Sensitive *Staphylococcus aureus*; NoSA, No *Staphylococcus aureus*; NA, Not Applicable

<sup>a</sup>Race / Ethnicity data for Non-SSTI individuals as well as one abscess individual was not obtained.

<sup>b</sup>Dashes correspond to data not available

<sup>c</sup>Site of Infection data for one individual was not obtained

<sup>d</sup>Military trainees were enrolled in an ongoing hygiene trial aimed at preventing SSTI prior to this study.

<sup>e</sup>Data for 2 individuals was not obtained.

**Supplementary Table 2: Microbiome Composition Differences**

| <b>Community-1</b>                        | <b>Community-2</b>                        | <b>Jaccard p-value<sup>a</sup></b> | <b><math>\Phi_{yc}</math> p-value<sup>a</sup></b> |
|-------------------------------------------|-------------------------------------------|------------------------------------|---------------------------------------------------|
| Nasal microbiomes-<br><20 years old       | Nasal microbiomes-<br>Ages 20-29          | 0.180                              | 0.490                                             |
| Nasal microbiomes-<br>Ages 20-29          | Nasal microbiomes-<br>>29 years old       | 0.612                              | 0.731                                             |
| Nasal microbiomes-<br><20 years old       | Nasal microbiomes-<br>>29 years old       | 0.276                              | 0.675                                             |
| Abscess microbiomes-<br>Upper extremities | Abscess microbiomes-<br>Lower extremities | 0.378                              | 0.257                                             |
| Abscess microbiomes-<br>Upper extremities | Abscess microbiomes-<br>Thorax            | 0.486                              | 0.515                                             |
| Abscess microbiomes-<br>Upper extremities | Abscess microbiomes-<br>Head/Neck         | 0.536                              | 0.725                                             |
| Abscess microbiomes-<br>Lower extremities | Abscess microbiomes-<br>Thorax            | 0.305                              | 0.379                                             |
| Abscess microbiomes-<br>Lower extremities | Abscess microbiomes-<br>Head/Neck         | 0.519                              | 0.512                                             |
| Abscess microbiomes-<br>Head/Neck         | Abscess microbiomes-<br>Thorax            | 0.435                              | 0.063                                             |

<sup>a</sup>P-values are the result of performing analysis of molecular variance (AMOVA) on the Jaccard and  $\Phi_{yc}$  distance matrices.

**Supplementary Table 3.** Percent abundance of each taxon per sample according to the GreenGenes database. Each column represents one sample and is labeled with sample ID, sample location (abscess cavity or nasal), and SSTI/*S. aureus* colonization status (Abscess or Non-SSTI; MRSA, MSSA, or NoSA). The total number of reads associated with each sample is included at the bottom of each column (See excel file in Supplemental Materials).

**Supplementary Table 4: Differential abundance of OTUs using Metastats**

| <b>OTU<sup>a</sup></b> | <b>Taxonomy<sup>b</sup></b> | <b>Community-1<br/>(Mean Percent<br/>Abundance)</b> | <b>Community-2<br/>(Mean Percent<br/>Abundance)</b> | <b>p-value</b> | <b>q-value</b> |
|------------------------|-----------------------------|-----------------------------------------------------|-----------------------------------------------------|----------------|----------------|
| 0001                   | <i>Staphylococcus</i> (g)   | <i>S. aureus</i> positive<br>nares<br>(34.78)       | <i>S. aureus</i> negative<br>nares<br>(20.63)       | 0.004          | 0.018          |
| 0003                   | <i>Corynebacterium</i> (g)  | <i>S. aureus</i> positive<br>nares<br>(2.19)        | <i>S. aureus</i> negative<br>nares<br>(9.15)        | 0.002          | 0.009          |
| 0014                   | Proteobacteria (p)          | Abscess nares<br>(0.29)                             | Non-SSTI nares<br>(0.99)                            | 0.002          | 0.005          |
| 0022                   | Proteobacteria (p)          | Abscess nares<br>(0.005)                            | Non-SSTI nares<br>(0.45)                            | 0.021          | 0.041          |
| 0029                   | Proteobacteria (p)          | Abscess nares<br>(0.02)                             | Non-SSTI nares<br>(0.17)                            | 0.005          | 0.011          |

<sup>a</sup>Operational Taxonomic Unit (OTU) designation as assigned by mothur

<sup>b</sup>(g), Genus; (p), Phylum
